# Supplementary material for: Bright Silicon Carbide Single-Photon Emitting Diodes at Low Temperatures: Toward Quantum Photonics Applications
Source: MDPI journal article supplement (doi:10.3390/nano11123177), 2021-11-24
Supplement: s1 [file s1]

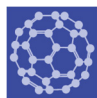

# Bright Silicon Carbide Single-Photon Emitting Diodes at Low Temperatures: Toward Quantum Photonics Applications

Igor A. Khramtsov and Dmitry Yu. Fedyanin \*

Laboratory of Nanooptics and Plasmonics, Center for Photonics and 2D Materials, Moscow Institute of Physics and Technology, Dolgoprudny 141700, Russia; khramtsov@phystech.edu

\* Correspondence: dmitry.fedyanin@phystech.edu

**Table S1.** Material parameters with temperature dependencies used in the numerical simulations.

| Parameter                               | Model                                                                                                                                                                                                                                                                                            | Comments |
|-----------------------------------------|--------------------------------------------------------------------------------------------------------------------------------------------------------------------------------------------------------------------------------------------------------------------------------------------------|----------|
| Energy bandgap                          | $E_{\text{gap}}(T) = E_{\text{gap}}(0) - \frac{\alpha T^2}{\beta + T},$ <p>where <math>E_{\text{gap}}(0) = 3.26</math> eV, <math>\alpha = 6.5 \times 10^{-4}</math> eV/K, <math>\beta = 1300</math> K</p>                                                                                        | [1]      |
| Electron SRH lifetime                   | $\tau_{\text{SRH}}^n(T) = \frac{\tau_{\text{SRH}}^n(300) \times \left(\frac{T}{300}\right)^{1.5}}{1 + \frac{N}{N_{\text{ref}}}},$ <p>where <math>\tau_{\text{SRH}}^n(300) = 340</math> ns,<br/><math>N_{\text{ref}} = 10^{17}</math> cm<sup>-3</sup></p>                                         | [2–4]    |
| Hole SRH lifetime                       | $\tau_{\text{SRH}}^p(T) = \frac{\tau_{\text{SRH}}^p(300) \times \left(\frac{T}{300}\right)^{-0.5}}{1 + \frac{N}{N_{\text{ref}}}},$ <p>where <math>\tau_{\text{SRH}}^p(300) = 100</math> ns,<br/><math>N_{\text{ref}} = 10^{17}</math> cm<sup>-3</sup></p>                                        | [2–4]    |
| Electron surface recombination velocity | $S_n(T) = \text{const} = 10^5$ cm/s                                                                                                                                                                                                                                                              | [5]      |
| Hole surface recombination velocity     | $S_p(T) = \text{const} = 10^5$ cm/s                                                                                                                                                                                                                                                              | [5]      |
| Electron saturation velocity            | <p>Si-like dependence <math display="block">v_{\text{sat}}^n(T) = \frac{v_{\text{sat}}^n(0)}{1 + 0.8 \exp\left(\frac{T}{600}\right)},</math></p> <p>where <math>v_{\text{sat}}^n(0) = 5.1 \times 10^7</math> cm/s,<br/>which gives <math>v_{\text{sat}}^n(300) = 2.2 \times 10^7</math> cm/s</p> | [6,7]    |
| Hole saturation velocity                | <p>Si-like dependence <math display="block">v_{\text{sat}}^p(T) = \frac{v_{\text{sat}}^p(0)}{1 + 0.8 \exp\left(\frac{T}{600}\right)},</math></p> <p>where <math>v_{\text{sat}}^p(0) = 3.5 \times 10^7</math> cm/s,<br/>which gives <math>v_{\text{sat}}^p(300) = 1.5 \times 10^7</math> cm/s</p> | [1,7]    |

|                                                                |                                                                                                                       |        |
|----------------------------------------------------------------|-----------------------------------------------------------------------------------------------------------------------|--------|
| Electron low-field mobility in the p <sup>+</sup> -type region | $\mu_n(T) = \mu_n(300) \times \left(\frac{T}{300}\right)^{-0.52},$<br>where $\mu_n(300) = 420 \text{ cm}^2/\text{Vs}$ | [8–10] |
| Hole low-field mobility in the p <sup>+</sup> -type region     | $\mu_p(T) = \mu_p(300) \times \left(\frac{T}{300}\right)^{-0.93},$<br>where $\mu_p(300) = 170 \text{ cm}^2/\text{Vs}$ | [8–10] |
| Electron low-field mobility in the i-type region               | $\mu_n(T) = \mu_n(300) \times \left(\frac{T}{300}\right)^{-1.59},$<br>where $\mu_n(300) = 700 \text{ cm}^2/\text{Vs}$ | [8–10] |
| Hole low-field mobility in the i-type region                   | $\mu_p(T) = \mu_p(300) \times \left(\frac{T}{300}\right)^{-1.59},$<br>where $\mu_p(300) = 220 \text{ cm}^2/\text{Vs}$ | [8–10] |
| Electron low-field mobility in the n <sup>+</sup> -type region | $\mu_n(T) = \mu_n(300) \times \left(\frac{T}{300}\right)^{-0.52},$<br>where $\mu_n(300) = 420 \text{ cm}^2/\text{Vs}$ | [8–10] |
| Hole low-field mobility in the n <sup>+</sup> -type region     | $\mu_p(T) = \mu_p(300) \times \left(\frac{T}{300}\right)^{-0.93},$<br>where $\mu_p(300) = 170 \text{ cm}^2/\text{Vs}$ | [8–10] |
| Donor activation energy                                        | $E_d(T) = \text{const} = 0.053 \text{ eV (hex site), } 0.1 \text{ eV (cubic site)}$                                   | [11]   |
| Acceptor activation energy                                     | $E_a(T) = \text{const} = 0.2 \text{ eV}$                                                                              | [12]   |
| Electron DOS mass in the conduction band                       | $m_e(T) = \text{const} = 0.77m_0,$<br>where $m_0$ is the electron rest mass.                                          | [13]   |
| Hole DOS mass in the valence band                              | $m_h(T) = \text{const} = 0.91m_0,$<br>where $m_0$ is the electron rest mass.                                          | [14]   |

## References

- Levinstein, M.E.; Rumyantsev, S.L.; Shur, M.S. *Properties of Advanced Semiconductor Materials: GaN, AlN, InN, BN, SiC, SiGe*; John Wiley & Sons: Hoboken, NJ, USA, **2001**; 98, 106–117.
- Ščajev, P.; Subačius, L.; Jarašiūnas, K.; Kato, A. Recombination and diffusion processes in electronic grade 4H silicon carbide. *Lithuanian Journal of Physics*, **2019**, *59*, 26–34.
- Liaugaudas, G.; Dargis, D.; Kwasnicki, P.; Arvinte, R.; Zielinski, M.; Jarašiūnas, K. Determination of carrier lifetime and diffusion length in Al-doped 4H-SiC epilayers by time-resolved optical techniques. *Journal of Physics D: Applied Physics*, **2014**, *48*(2), 025103.
- Li, X.; Luo, Y.; Fursin, L.; Zhao, J. H.; Pan, M.; Alexandrov, P.; Weiner, M. On the temperature coefficient of 4H-SiC BJT current gain. *Solid-State Electronics*, **2003**, *47*(2), 233–239.
- Kohama, K.; Mori, Y.; Kato, M.; Ichimura, M. Evaluation of Temperature Dependence of Surface Recombination Velocities for n-type 4H-SiC, Extended Abstracts of the 2015 International Conference on Solid State Devices and Materials, Sapporo, Japan, 27–30 September 2015.
- Khan, I. A.; Cooper, J.A. Measurement of high-field electron transport in silicon carbide. *IEEE Transactions on Electron Devices*, **2000**, *47*(2), 269–273.
- Selberherr, S. *Analysis and simulation of semiconductor devices*. Springer-Verlag: New York, USA, **1984**, pp. 96.
- Pernot, J.; Zawadzki, W.; Contreras, S.; Robert, J.L.; Neyret, E.; Di Cioccio, L. Electrical transport in n-type 4H silicon carbide. *Journal of Applied Physics*, **2001**, *90*(4), 1869–1878.
- Erginsoy, C. Neutral impurity scattering in semiconductors. *Physical Review*, **1950**, *79*(6), 1013.
- Sze, S.M.; Ng, K.K. *Physics of Semiconductor Devices*, John Wiley & Sons: Hoboken, NJ, USA, **2006**, 28–50.

11. Evwaraye, A.O., Smith, S.R., & Mitchel, W.C. Shallow and deep levels in n-type 4H-SiC. *Journal of Applied Physics*, **1996**, 79(10), 7726–7730.
12. Ivanov, I.G., Henry, A., Janzén, E. Ionization energies of phosphorus and nitrogen donors and aluminum acceptors in 4 H silicon carbide from the donor-acceptor pair emission. *Physical Review B*, **2005**, 71(24), 241201.
13. Son, N.T., Chen, W.M., Kordina, O., Konstantinov, A.O., Monemar, B., Janzén, E., Meyer, B.K. Electron effective masses in 4H SiC. *Applied physics letters*, **1995**, 66(9), 1074–1076.
14. Son, N.T., Hai, P.N., Chen, W.M., Hallin, C., Monemar, B., Janzén, E. Hole effective masses in 4H SiC determined by optically detected cyclotron resonance. *In Materials Science Forum*, **2000**, 338, 563–566.
